# Supplementary material for: Enhancing multiphoton upconversion emissions through confined energy migration in lanthanide-doped Cs2NaYF6 nanoplatelets
Source: Royal Society of Chemistry journal article supplement (doi:10.1039/d1nr01745d), 2021-01-01
Supplement: d1nr01745d1.pdf [file d1nr01745d1.pdf]

Electronic Supplementary Material (ESI) for Nanoscale.

This journal is © The Royal Society of Chemistry 2021

## Supporting Information

### **Enhancing multiphoton upconversion emissions through confined energy migration in lanthanide-doped Cs<sub>2</sub>NaYF<sub>6</sub> nanoplatelets**

Chang Zhou,<sup>a,b</sup> Datao Tu,<sup>\*,a,b,c</sup> Siyuan Han,<sup>a</sup> Peng Zhang,<sup>a,b</sup> Luping Wang,<sup>a</sup> Shaohua Yu,<sup>a</sup> Jin Xu,<sup>a,c</sup> Renfu Li,<sup>a,c</sup> and Xueyuan Chen<sup>\*,a,b,c</sup>

[a] CAS Key Laboratory of Design and Assembly of Functional Nanostructures, and Fujian Key Laboratory of Nanomaterials, Fujian Institute of Research on the Structure of Matter, Fujian Institute of Research on the Structure of Matter, Chinese Academy of Sciences, Fuzhou, Fujian 350002, China

[b] College of Chemistry, Fuzhou University, Fujian, 350108, China

[c] Fujian Science & Technology Innovation Laboratory for Optoelectronic Information of China, Fuzhou, Fujian 350108, P. R. China

Fax/Tel: +86-591-63179421;

E-mail: dttu@fjirsm.ac.cn, [xchen@fjirsm.ac.cn](mailto:xchen@fjirsm.ac.cn)

## I. Supplementary Materials & Methods

**Chemicals and materials:**  $\text{Gd}(\text{Ac})_3 \cdot x\text{H}_2\text{O}$  (99.9%),  $\text{Y}(\text{Ac})_3 \cdot x\text{H}_2\text{O}$  (99.9%),  $\text{Yb}(\text{Ac})_3 \cdot x\text{H}_2\text{O}$  (99.9%),  $\text{Tm}(\text{Ac})_3 \cdot x\text{H}_2\text{O}$  (99.9%),  $\text{Tb}(\text{Ac})_3 \cdot x\text{H}_2\text{O}$  (99.9%),  $\text{Eu}(\text{Ac})_3 \cdot x\text{H}_2\text{O}$  (99.9%), oleic acid (OA) and 1-octadecene (ODE) were purchased from Sigma-Aldrich. Oleylamine (OAm), CsF (99.9%) and  $\text{NaHCO}_3$  (99.9%) were purchased from Aladdin (Shanghai, China).  $\text{NaAc} \cdot 3\text{H}_2\text{O}$  (AR),  $\text{NH}_4\text{F}$  (AR), ethyl acetate, methanol, ethanol and hexane were purchased from Sinopharm Chemical Reagent Co., China.  $\text{Cs}_2\text{CO}_3$  (99.9%),  $\text{Y}_2\text{O}_3$  (99.99%),  $\text{Yb}_2\text{O}_3$  (99.99%),  $\text{Tm}_2\text{O}_3$  (99.99%) were purchased from HWRK CHEM, China. All the chemical reagents were of analytical grade and used as received without further purification unless otherwise noted. Distilled water was used throughout the experiments.

**Synthesis of  $\text{Cs}_2\text{NaYF}_6:\text{Yb/Ln}$  NPs:**  $\text{Cs}_2\text{NaYF}_6:\text{Yb/Ln}$  (Ln = Tm, Gd, Eu, Tb) nanoplatelets (NPs) were synthesized via a modified high-temperature co-precipitation method. Typically, x (0.005 ~ 0.015) mmol of  $\text{Ln}(\text{Ac})_3$ , y (0.1 ~ 0.5 - x) mmol of  $\text{Yb}(\text{Ac})_3$ , (0.5 - x - y) mmol of  $\text{Y}(\text{Ac})_3$  and 0.5 mmol of NaAc were mixed with 8 mL of OA, 4 mL of OAm and 8 mL of ODE in a 100-mL two-necked round-bottom flask. The resulting mixture was heated to 120 °C under  $\text{N}_2$  flow with constant stirring for 30 min to remove the residual water and oxygen. After cooling down to room temperature (RT), 5 mL of methanol solution containing 3 mmol of CsF was added and the solution was stirred at 60 °C for 30 min. The resulting solution was heated to 320 °C under  $\text{N}_2$  flow with vigorous stirring for 60 min, and then cooled down to RT. The obtained NPs were precipitated by addition of 20 mL of ethyl acetate. The product solution was centrifuged at 8000 rpm for 5 min. The supernatant was discarded, and the precipitated NPs were re-dispersed in 2 mL of hexane. By centrifugation at 5000 rpm for 5 min, the supernatant was precipitated with 4 mL ethyl acetate. The solution was centrifuged again at 12000 rpm for 5 min. The final NPs were obtained by discarding the supernatant. The size of these NPs can be tuned by varying the solvent ratio of OA, OAm and ODE under otherwise identical conditions. NPs with different doping concentrations and compositions were synthesized by adjusting the molar ratio of metal precursors under otherwise identical conditions.

**Synthesis of  $\text{Cs}_2\text{NaYF}_6:\text{Yb/Ln}$  powders:**  $\text{Cs}_2\text{NaYF}_6:\text{Yb/Ln}$  powders were prepared by a solid-state reaction method.<sup>1</sup> In a typical synthesis of  $\text{Cs}_2\text{NaYF}_6:\text{Yb/Tm}$  powders, 5 mmol of  $\text{Cs}_2\text{CO}_3$ , 2.5 mmol of  $\text{NaHCO}_3$ , 2 mmol of  $\text{Y}_2\text{O}_3$ , 15 mmol of  $\text{NH}_4\text{F}$ , 0.475 mmol of  $\text{Yb}_2\text{O}_3$  and 0.025 mmol of  $\text{Tm}_2\text{O}_3$  powders were mixed with 3 mL of acetone and ground thoroughly. The obtained mixture was heated at 150 °C for 7 h in muffle furnace and then sintered at 450 °C for 30 min in an air atmosphere. The heating rate was set at 5 °C·min<sup>-1</sup>.

**Synthesis of  $\alpha\text{-NaYF}_4:\text{Ln}^{3+}$  NPs:**  $\alpha\text{-NaYF}_4:\text{Yb/Tm}$  NPs were synthesized via a solid-liquid-thermal-decomposition method.<sup>2</sup> Typically, 0.5 mmol of  $\text{Y}(\text{Ac})_3$ , 0.49 mmol of  $\text{Yb}(\text{Ac})_3$ , and 0.01 mmol of  $\text{Tm}(\text{Ac})_3$  were mixed with 8 mL of OA and 12 mL of ODE in a 100-mL two-neck round-bottom flask. The resulting mixture was heated at 180 °C under  $\text{N}_2$  flow with constant stirring for 20 min to form a

clear solution, then cooled down to RT. Thereafter, 2 mmol of NaHF<sub>2</sub> powder was added. The solution was heated to 260 °C under N<sub>2</sub> flow with vigorous stirring for 60 min. Subsequently, the mixture was allowed to cool down to RT. The obtained NPs were precipitated by addition of ethanol, collected by centrifugation, washed with ethanol and cyclohexane several times, and finally re-dispersed in cyclohexane.

**Characterization:** Powder X-ray diffraction (XRD) patterns of the samples were collected with an X-ray diffractometer (MiniFlex 600, Rigaku) with Cu K $\alpha$ 1 radiation ( $\lambda = 0.154187$  nm). Transmission electron microscopy (TEM) and high-resolution TEM (HRTEM) measurements were performed by using a TECNAI G<sup>2</sup> F20 TEM equipped with the energy dispersive X-ray (EDX) spectrum. Scanning electron microscope (SEM) measurement was performed by using a JSM6700F SEM. Upconversion (UC) emission spectra were carried out upon 980-nm excitation provided by a continuous-wave semiconductor laser diode (FLS980, Edinburgh). Time-resolved spectra and UC lifetimes were measured with a customized ultraviolet (UV) to mid-infrared steady-state and phosphorescence lifetime spectrometer (FSP980, Edinburgh) equipped with a tunable mid-band Optical Parametric Oscillator (OPO) pulse laser as the excitation source (410-2400 nm, 10 Hz, pulse width 5 ns, Vibrant 355II, OPOTEK) with the average power density of  $\sim 40$  W/cm<sup>2</sup>. Effective PL lifetimes ( $\tau_{eff}$ ) were calculated

$$\text{by: } \tau_{eff} = \frac{1}{I_{max}} \int_0^{\infty} I(t) dt$$

where  $I(t)$  denotes the PL intensity as a function of time  $t$ , and  $I_{max}$  is the maximum PL intensity. All photoluminescence measurements were carried out at RT.

**Determination of the upconversion quantum yields (UCQYs):** Upconversion quantum yield (UCQY) measurements were conducted using the same experimental setup as following previously reported.<sup>3</sup> These measurements include efficiency of upconversion from 980 nm excitation to emission in the visible. Briefly, a 980-nm diode laser (MDL-III-980-2W, Changchun New Industries Optoelectronics Tech Co., Ltd.) was used to excite UCL materials of this study. Excitation of the samples occurred within an integrating sphere (150 mm in diameter, Edinburgh Instruments), where samples were held in a cuvette dispersed in hexane or clamped in quartz tablets. Emitted light was collected from samples via a fiber optic spectrometer (QE65pro, Ocean Optics). An optical lens was used to collimate the laser beam and direct on the sample with a focus of 1 mm<sup>2</sup>, and a laser powermeter (Model 1918-C, Newport) was applied to measure the excitation power on the sample. The UCQYs were then calculated by<sup>4</sup>

$$QY = \frac{N_e}{N_a} = \frac{L_s}{E_R - E_S}$$

where  $N_e$  and  $N_a$  are the photons emitted and absorbed, respectively;  $L_s$  is the emission intensity,  $E_R$  and  $E_S$  are the intensities of the excitation light in the presence of the pure Cs<sub>2</sub>NaYF<sub>6</sub> NPs (reference) and the UCNP samples, respectively. The UCL emissions in the spectral region of 400-850 nm for Tm<sup>3+</sup> were integrated for the QY determination. All the UCQYs for each sample were measured independently for at least three times under identical conditions to yield the average value and standard deviation.

## II. Supplementary Table

**Table S1.** Comparison of UV emission for a variety of Yb<sup>3+</sup>, Tm<sup>3+</sup>-doped UC samples. Dopant concentration, nanoparticle size and power density of 980-nm laser are provided to address different measurement conditions, and UV/NIR ratio was determined based on the integrated UC luminescence (UCL) intensity of UV and NIR regions.

| Samples                                                                   | Size (nm)       | Power Density (W/cm <sup>2</sup> ) | UV/NIR Ratio | Ref.             |
|---------------------------------------------------------------------------|-----------------|------------------------------------|--------------|------------------|
| LiYbF <sub>4</sub> :1%Tm                                                  | 17              | 5                                  | 0.14         | 3                |
| LiYF <sub>4</sub> :20%Yb/1%Tm                                             | /               | 5                                  | 0.01         | 3                |
| NaYbF <sub>4</sub> :1%Tm                                                  | /               | 5                                  | 0.02         | 3                |
| NaYF <sub>4</sub> :20%Yb/1%Tm                                             | /               | 5                                  | 0.01         | 3                |
| NaYF <sub>4</sub> :17%Yb/1.2%Tm                                           | 30              | 140                                | 0.01         | 5                |
| LiLuF <sub>4</sub> :20%Yb/0.5%Tm@LiLuF <sub>4</sub>                       | 50              | 127                                | 0.05         | 6                |
| LiYbF <sub>4</sub> :0.5%Tm@LiYF <sub>4</sub>                              | 20              | 400                                | 1            | 7                |
| Sr <sub>1-x</sub> Yb <sub>x</sub> F <sub>2+x</sub> :1%Tm@CaF <sub>2</sub> | 11              | 250                                | 0.13         | 8                |
|                                                                           |                 | 400                                | 0.18         |                  |
| <b>NaYF<sub>4</sub>:49%Yb/1%Tm</b>                                        | <b>5</b>        | <b>150</b>                         | <b>0.03</b>  | <b>This work</b> |
| <b>Cs<sub>2</sub>NaYF<sub>6</sub>:49%Yb/1%Tm bulk</b>                     | <b>&gt;1000</b> | <b>5</b>                           | <b>0.01</b>  | <b>This work</b> |
|                                                                           |                 | <b>150</b>                         | <b>0.51</b>  |                  |
| <b>Cs<sub>2</sub>NaYF<sub>6</sub>:49%Yb/1%Tm</b>                          | <b>11</b>       | <b>5</b>                           | <b>0.24</b>  | <b>This work</b> |
|                                                                           |                 | <b>150</b>                         | <b>1.20</b>  |                  |

**Table S2** PL lifetimes of Cs<sub>2</sub>NaYF<sub>6</sub>:Yb/Tm/Gd NPs with various doping concentration of Gd<sup>3+</sup>.

| Gd <sup>3+</sup> concentration<br>(mol %) | $\tau_{\text{eff}}$ of Tm <sup>3+</sup><br>( <sup>1</sup> I <sub>6</sub> → <sup>3</sup> F <sub>4</sub> , $\mu\text{s}$ ) | $\tau_{\text{eff}}$ of Gd <sup>3+</sup><br>( <sup>6</sup> P <sub>7/2</sub> → <sup>8</sup> S <sub>7/2</sub> , ms) |
|-------------------------------------------|--------------------------------------------------------------------------------------------------------------------------|------------------------------------------------------------------------------------------------------------------|
| <b>0</b>                                  | 163.96                                                                                                                   | /                                                                                                                |
| <b>10</b>                                 | 102.27                                                                                                                   | 1.61                                                                                                             |
| <b>20</b>                                 | 78.46                                                                                                                    | 5.12                                                                                                             |
| <b>30</b>                                 | 59.89                                                                                                                    | 7.03                                                                                                             |
| <b>40</b>                                 | 50.47                                                                                                                    | 2.97                                                                                                             |

### III. Supplementary Figures

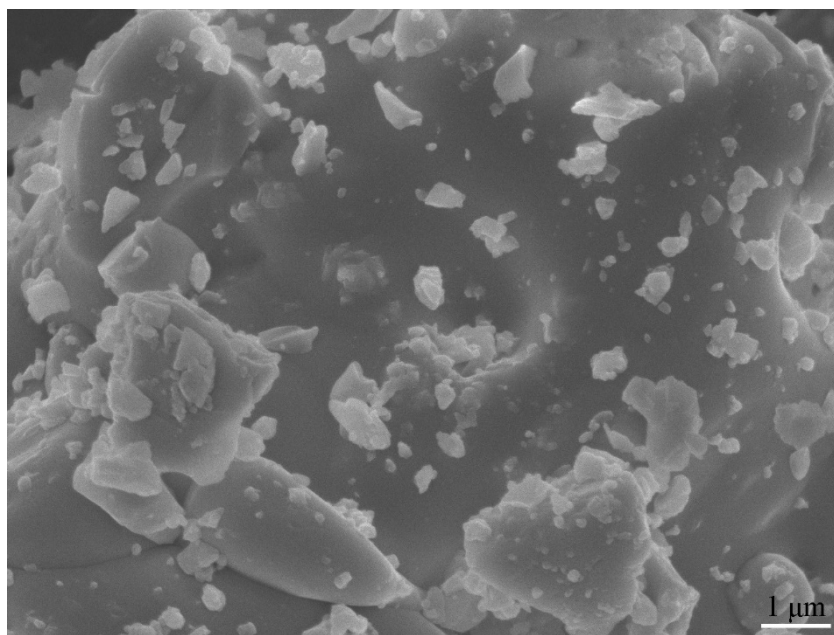

**Figure S1.** SEM image of the Cs<sub>2</sub>NaYF<sub>6</sub>:Yb/Tm bulk materials.

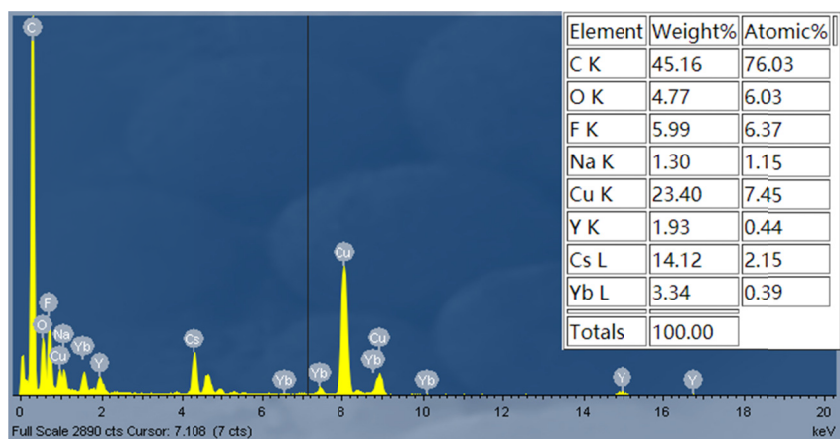

**Figure S2.** EDX spectrum of  $\text{Cs}_2\text{NaYF}_6:\text{Yb/Tm}$  (49/1 mol%) NPs, revealing a molar ratio of approximately 1:3 for  $\text{Cs}^+/\text{F}^-$  in the as-prepared NPs.  $\text{Tm}^{3+}$  ion was not detected because of its low doping concentration ( $<1$  mol%).

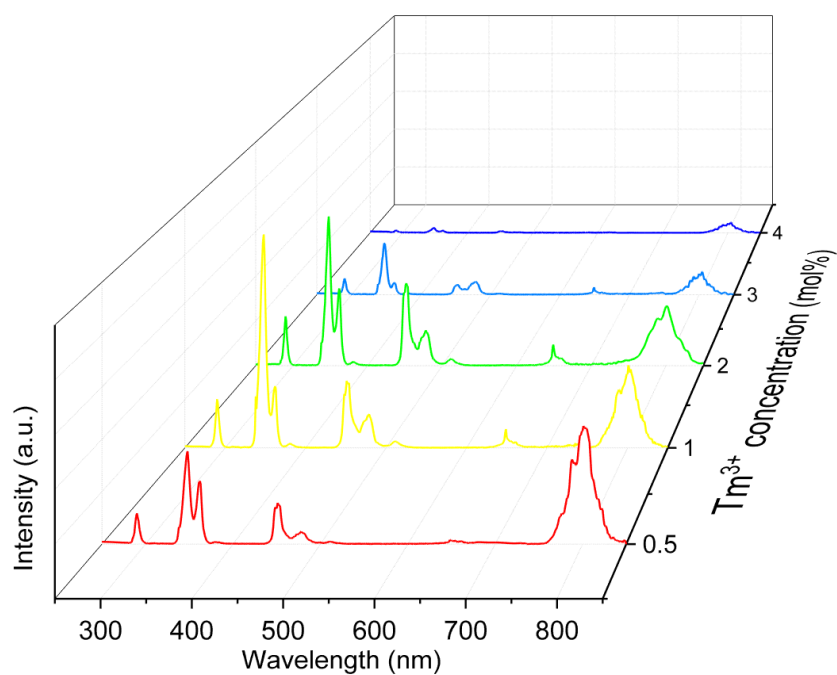

**Figure S3.** UCL spectra of the Cs<sub>2</sub>NaYF<sub>6</sub>:Yb/Tm (49/x mol%) NPs dispersed in hexane. A maximal UCL intensity of Tm<sup>3+</sup> in the UV region can be achieved with the concentration of 1 mol% for Tm<sup>3+</sup>. At a higher doping concentration of Tm<sup>3+</sup> (>2 mol%), the UCL intensity reduced significantly.



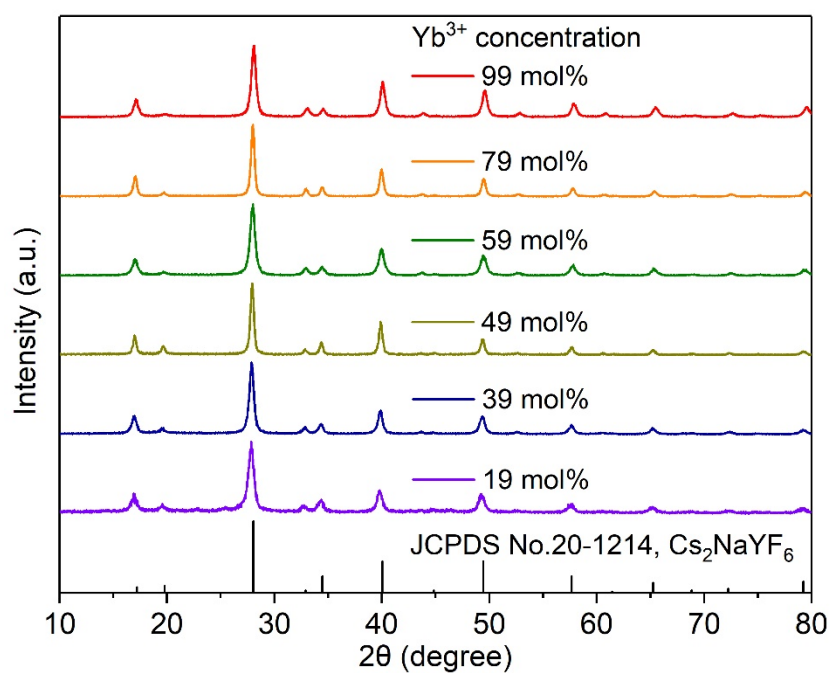

**Figure S4.** XRD patterns of Cs<sub>2</sub>NaYF<sub>6</sub>:Yb/Tm (x/1 mol%) NPs with different Yb<sup>3+</sup> contents. All the diffraction peaks of the NPs are well consistent with the cubic Cs<sub>2</sub>NaYF<sub>6</sub> (JCPDS No. 20-1214), which indicates that the obtained NPs are pure cubic phase without any impurity.

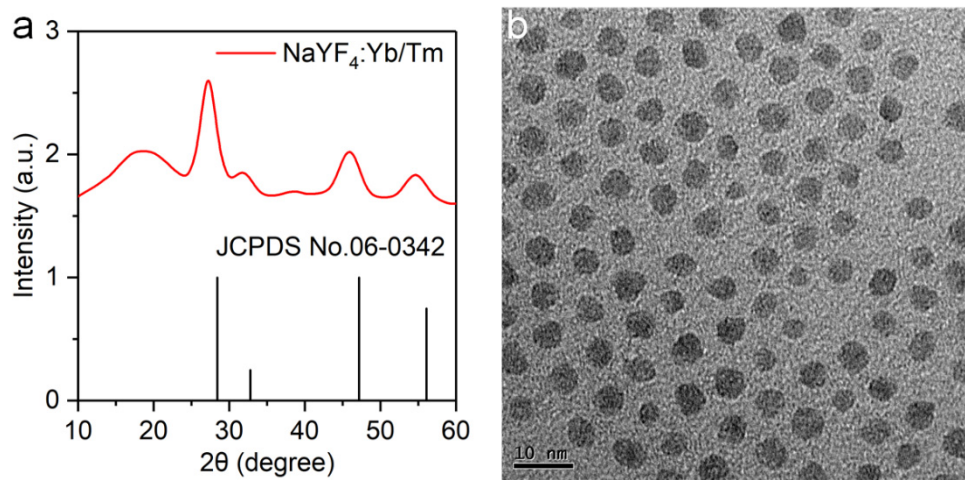

**Figure S5.** (a) XRD pattern of  $\alpha$ -NaYF<sub>4</sub>:Yb/Tm (49/1 mol%) nanocrystals. All the diffraction peaks match well with the  $\alpha$ -NaYF<sub>4</sub> (JCPDS No. 06-0342). (b) TEM image of the  $\alpha$ -NaYF<sub>4</sub>:Yb/Tm nanocrystals.

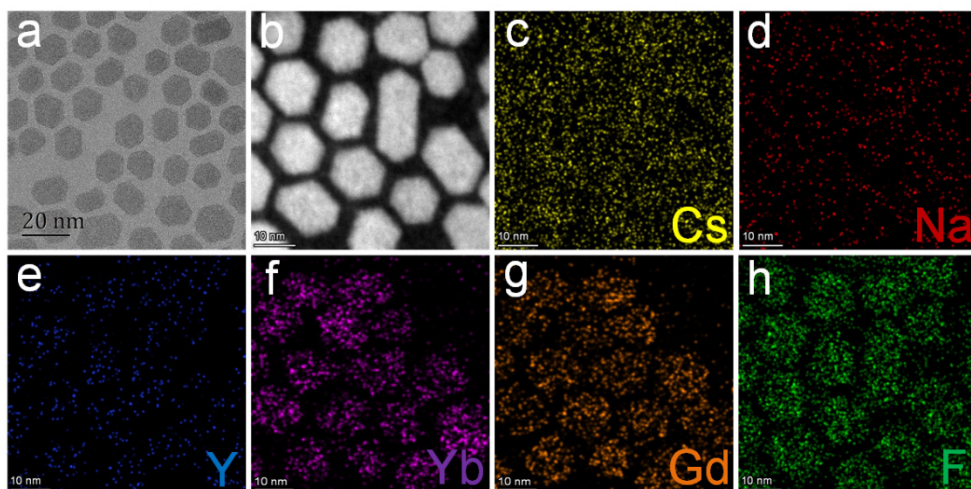

**Figure S6.** (a) Bright-field and (b) dark-field TEM images of  $\text{Cs}_2\text{NaYF}_6:\text{Yb/Tm/Gd}$  (49/1/30 mol%) NPs. (c-h) EDX elemental mapping images of Cs, Na, Y, Yb, Gd and F in  $\text{Cs}_2\text{NaYF}_6:\text{Yb/Tm/Gd}$  NPs (49/1/30 mol%). These results indicate that the  $\text{Ln}^{3+}$  dopants are homogeneously distributed among the as-prepared NPs.

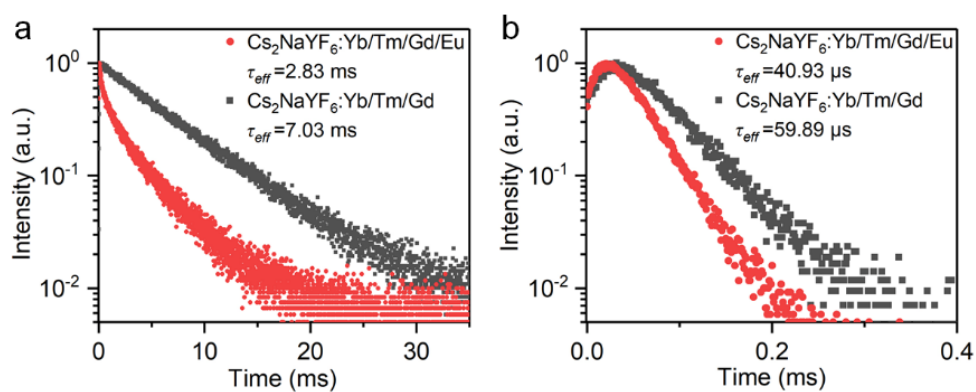

**Figure S7.** UCL decays of  $\text{Gd}^{3+}$  and  $\text{Tm}^{3+}$  in  $\text{Cs}_2\text{NaYF}_6:\text{Yb/Tm/Gd}$  NPs (49/1/30 mol%) and  $\text{Cs}_2\text{NaYF}_6:\text{Yb/Tm/Gd/Eu}$  NPs (49/1/30/10 mol%) by monitoring their emissions at 311 and 348 nm, which correspond to (a)  ${}^6\text{P}_{7/2} \rightarrow {}^8\text{S}_{7/2}$  of  $\text{Gd}^{3+}$  and (b)  ${}^1\text{I}_6 \rightarrow {}^3\text{F}_4$  of  $\text{Tm}^{3+}$ . It was determined that the photoluminescence lifetime of  ${}^6\text{P}_{7/2}$  of  $\text{Gd}^{3+}$  and  ${}^1\text{I}_6$  of  $\text{Tm}^{3+}$  were shortened after the doping of  $\text{Eu}^{3+}$ .

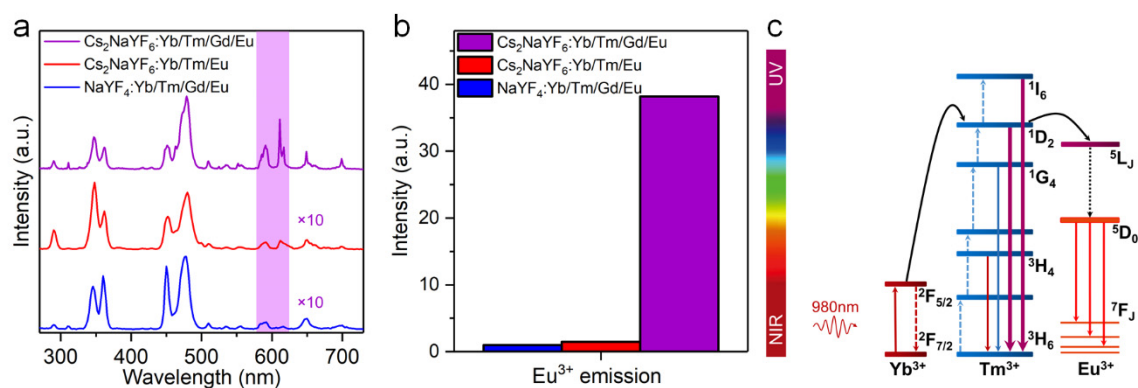

**Figure S8.** (a) UCL spectra of Cs<sub>2</sub>NaYF<sub>6</sub>:Yb/Tm/Gd/Eu (49/1/30/10 mol%), Cs<sub>2</sub>NaYF<sub>6</sub>:Yb/Tm/Eu (49/1/10 mol%) NPs, and  $\alpha$ -NaYF<sub>4</sub>:Yb/Tm/Gd/Eu (49/1/30/10 mol%) nanocrystals. It was found that the emissions of Eu<sup>3+</sup> in both Cs<sub>2</sub>NaYF<sub>6</sub>:Yb/Tm/Eu and NaYF<sub>4</sub>:Yb/Tm/Gd/Eu are rather weak. (b) Comparison of the integral emission intensity of Eu<sup>3+</sup> peaking at 591 nm and 612 nm in the Cs<sub>2</sub>NaYF<sub>6</sub>:Yb/Tm/Gd/Eu, Cs<sub>2</sub>NaYF<sub>6</sub>:Yb/Tm/Eu NPs, and NaYF<sub>4</sub>:Yb/Tm/Gd/Eu nanocrystals, with the relative integral intensities of 38.2, 1.5, and 1, respectively. (c) Schematic energy level diagram showing the energy transfer process of Yb<sup>3+</sup>, Tm<sup>3+</sup> and Eu<sup>3+</sup> in Cs<sub>2</sub>NaYF<sub>6</sub>:Yb/Tm/Eu.

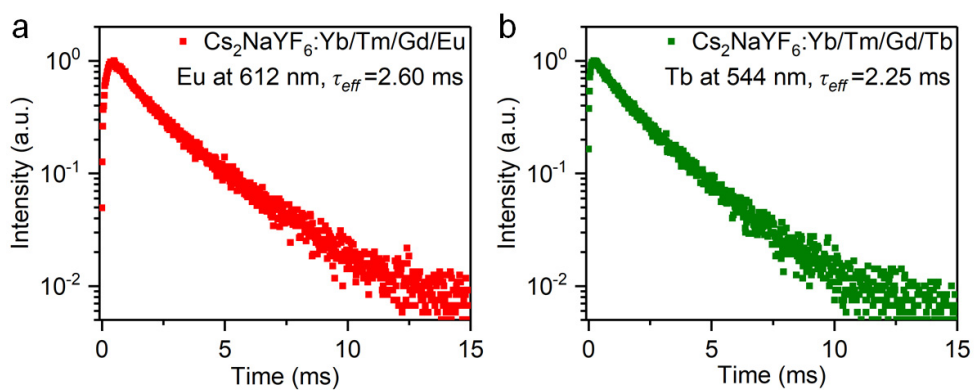

**Figure S9.** UCL decays of  $\text{Eu}^{3+}$  and  $\text{Tb}^{3+}$  in (a)  $\text{Cs}_2\text{NaYF}_6:\text{Yb/Tm/Gd/Eu}$  and (b)  $\text{Cs}_2\text{NaYF}_6:\text{Yb/Tm/Gd/Tb}$  NPs by monitoring their emissions at 612 and 544 nm, which correspond to  ${}^5\text{D}_0 \rightarrow {}^7\text{F}_2$  of  $\text{Eu}^{3+}$  and  ${}^5\text{D}_4 \rightarrow {}^7\text{F}_5$  of  $\text{Tb}^{3+}$ , respectively. The effective lifetimes for  ${}^5\text{D}_0$  level of  $\text{Eu}^{3+}$  and  ${}^5\text{D}_4$  level of  $\text{Tb}^{3+}$  in  $\text{Cs}_2\text{NaYF}_6$  NPs were determined to be 2.60 ms and 2.25 ms, respectively.

## Reference

1. Y. M. Yang, Z. Y. Li, J. Y. Zhang, Y. Lu, S. Q. Guo, Q. Zhao, X. Wang, Z. J. Yong, H. Li, J. P. Ma, Y. Kuroiwa, C. Moriyoshi, L. L. Hu, L. Y. Zhang, L. R. Zheng and H. T. Sun, *Light Sci. Appl.*, 2018, **7**, 11.
2. W. You, D. Tu, W. Zheng, X. Shang, X. Song, S. Zhou, Y. Liu, R. Li and X. Chen, *Nanoscale*, 2018, **10**, 11477-11484.
3. Q. L. Zou, P. Huang, W. Zheng, W. W. You, R. F. Li, D. T. Tu, J. Xu and X. Y. Chen, *Nanoscale*, 2017, **9**, 6521-6528.
4. J.-C. Boyer and F. C. J. M. van Veggel, *Nanoscale*, 2010, **2**, 1417-1419.
5. M. Kraft, C. Würth, E. Palo, T. Soukka and U. Resch-Genger, *Methods Appl. Fluoresc.*, 2019, **7**, 024001.
6. P. Huang, W. Zheng, S. Y. Zhou, D. T. Tu, Z. Chen, H. M. Zhu, R. F. Li, E. Ma, M. D. Huang and X. Y. Chen, *Angew. Chem. Int. Ed.*, 2014, **53**, 1252-1257.
7. T. Cheng, R. Marin, A. Skripka and F. Vetrone, *J. Am. Chem. Soc.*, 2018, **140**, 12890-12899.
8. S. Fischer, C. Siefe, D. F. Swearer, C. A. McLellan, A. P. Alivisatos and J. A. Dionne, *Angew. Chem. Int. Ed.*, 2020, **59**, 21603-21612.
